# Supplementary material for: Boosting the catalytic behavior and stability of a gold catalyst with structure regulated by ceria
Source: Royal Society of Chemistry journal article supplement (doi:10.1039/d1ra07686h), 2022-01-01
Supplement: d1ra07686h1.pdf [file d1ra07686h1.pdf]

Supporting information

## Boosting the catalytic behavior and stability of gold catalyst with structure regulated by ceria

Jingjie Luo,<sup>†a</sup> Fengxiang Shan,<sup>†a</sup> Sihan Yang,<sup>a</sup> Yixue Zhou,<sup>a</sup> Changhai Liang<sup>\*a</sup>

Laboratory of Advanced Materials & Catalytic Engineering (AMCE), School of Chemical Engineering, Dalian University of Technology, Panjin 124221, China

\*Corresponding author. Tel/Fax: +86-411-84986353; E-mail: changhai@dlut.edu.cn

‡ The authors contributed equally to the work.

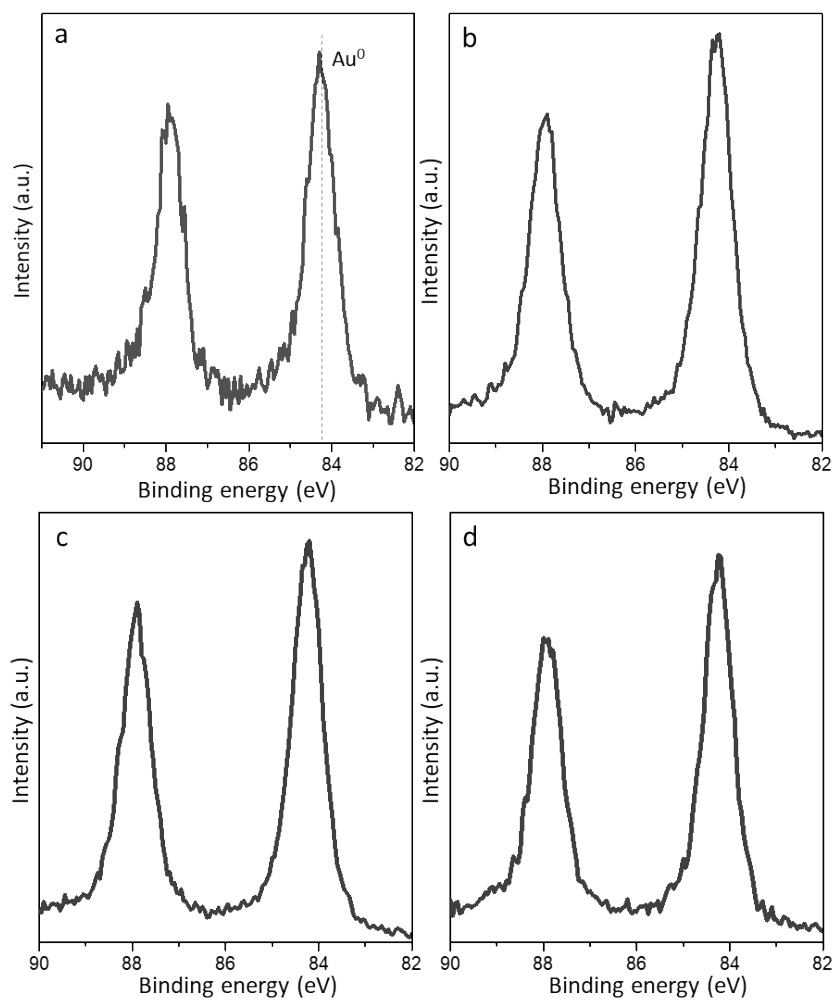

Figure S1. XPS spectra of Au<sub>4f</sub> region of (a) Au/CNT-A, (b) Au/CNT-T<sub>H</sub>, (c) Au/CNT-T<sub>L</sub> and (d) Au/CNT-Na catalysts.

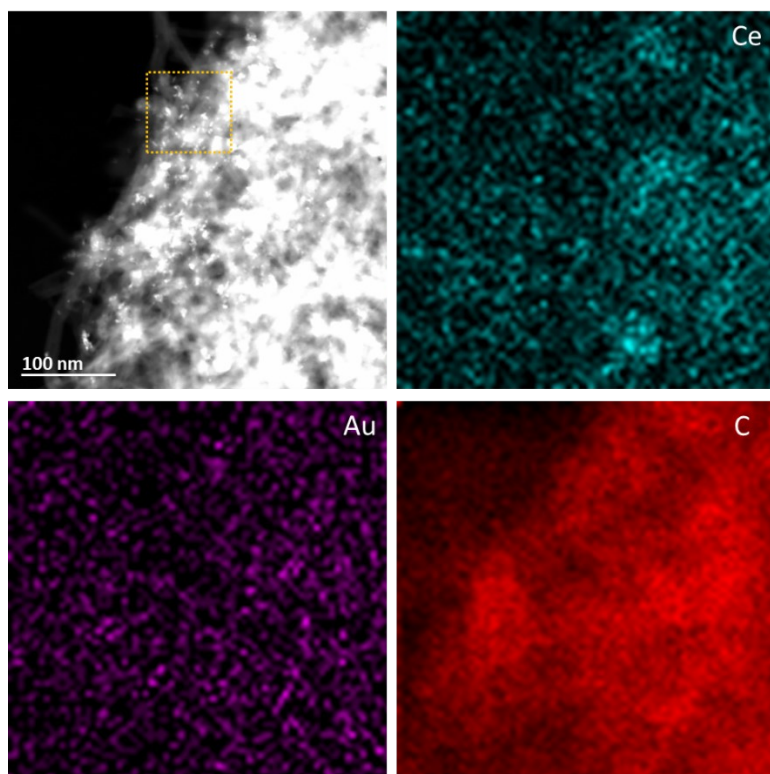

Figure S2. HAADF-STEM elemental-mapping of the Au-Ce<sub>5</sub>/CNT sample.

Table S1. The TOF value based on each reaction and the related reaction conditions.<sup>a</sup>

| Sample                | Reaction time (h) | Conv. of BnOH <sup>b</sup> (%) | Mass of Catal. <sup>c</sup> (mg) | Distribution degree | TOF (h <sup>-1</sup> ) |
|-----------------------|-------------------|--------------------------------|----------------------------------|---------------------|------------------------|
| Au/CNT-A              | 3                 | 11.0%                          | 1.3                              | 23.5%               | 583                    |
| Au/CNT-T <sub>H</sub> | 3                 | 8.4%                           | 2.1                              | 12.6%               | 557                    |
| Au/CNT-T <sub>L</sub> | 3                 | 6.4%                           | 4.9                              | 8.0%                | 271                    |
| Au/CNT-Na             | 3                 | 3.4%                           | 5.1                              | 6.6%                | 163                    |

<sup>a</sup> In order to lower the conversion of benzyl alcohol (BnOH), the reaction temperature was lowered to 40 °C with fewer amount of catalyst.

<sup>b</sup> Conversion of BnOH during the reaction.

<sup>c</sup> The quality of catalyst used for each reaction.

Table S2. Information of oxygen species based on XPS spectra of the O1s core level.

| Sample                    | O1s (%) |       |     |                        | O/C <sup>b</sup> |
|---------------------------|---------|-------|-----|------------------------|------------------|
|                           | C-O     | O=C-O | C=O | Lattice O <sup>a</sup> |                  |
| CNT                       | 1.0     | 0.4   | 0.4 | -                      | 1.8              |
| Au/CNT-A                  | 0.9     | 0.8   | 0.6 | -                      | 2.3              |
| Au-Ce <sub>2.5</sub> /CNT | 1.8     | 1.1   | 0.7 | 1.3                    | 4.9 <sup>d</sup> |
| Au-Ce <sub>5</sub> /CNT   | 0.8     | 1.5   | 1.7 | 2.3                    | 6.3              |
| Au-Ce <sub>10</sub> /CNT  | 1.0     | 1.8   | 1.9 | 2.9                    | 7.6              |

<sup>a</sup> Surface lattice oxygen species from CeO<sub>2</sub> in the series of Au-Ce<sub>x</sub>/CNT samples.

<sup>b</sup> Atomic ratio between O and C elements detected by XPS spectra.

Table S3. Information of reaction rate for different samples.

| Sample                | React. rate <sup>a</sup> | Particle sizes (nm) |                  | Sample                    | React. rate |       | Particle sizes (nm) |     |
|-----------------------|--------------------------|---------------------|------------------|---------------------------|-------------|-------|---------------------|-----|
|                       | 80 °C                    | XRD <sup>b</sup>    | TEM <sup>c</sup> |                           | 40 °C       | 50 °C | XRD                 | TEM |
| Au/CNT-A              | 15.1                     | 5.8                 | 4.9              | Au-Ce <sub>2.5</sub> /CNT | 13.8        | 12.5  | 5.9                 |     |
| Au/CNT-T <sub>H</sub> | 14.0                     | 9.4                 | 9.1              | Au-Ce <sub>5</sub> /CNT   | 15.7        | 18.6  | 5.0                 | 3.8 |
| Au/CNT-T <sub>L</sub> | 8.5                      | 18.2                | 14.3             | Au-Ce <sub>7.5</sub> /CNT | 10.4        | 15.8  | 9.1                 |     |
| Au/CNT-Na             | 5.3                      | 17.3                | 21.9             | Au-Ce <sub>10</sub> /CNT  | 9.4         | 14.7  | 10.2                |     |

<sup>a</sup> Reaction rate in mmol/g<sub>Au</sub>/min;

<sup>b</sup> Average particles sizes calculated by XRD;

<sup>c</sup> Average particles sizes calculated by TEM images based on more than 200 particles.
